# Supplementary material
Source: PubMed Central journal article supplement (PMC4121886)
Supplement: NIHMS475234-supplement-Supplementary_File.pdf [file NIHMS475234-supplement-Supplementary_File.pdf]

Table 1 Supplement: EGFR Mutations Associated with Disease Control (Partial Response, Complete Response, or Stable Disease)<sup>+</sup>

| Mutation                           | N                                 |                 |                 |                 |                                        | Number of unique      |              | References |
|------------------------------------|-----------------------------------|-----------------|-----------------|-----------------|----------------------------------------|-----------------------|--------------|------------|
|                                    | Therapy-<br>response<br>instances | PR<br>responses | SD<br>responses | CR<br>responses | Disease<br>control total<br>(PR+SD+CR) | Patients <sup>a</sup> | Studies<br>* |            |
| <b>A702S</b>                       | 2                                 | 2               | 0               | 0               | 2                                      | 2                     | 1            | 1          |
| <b>A839T</b>                       | 2                                 | 2               | 0               | 0               | 2                                      | 2                     | 2            | 2,3        |
| <b>A840A + V843I</b>               | 1                                 | 1               | 0               | 0               | 1                                      | 1                     | 1            | 4          |
| <b>A871T</b>                       | 1                                 | 1               | 0               | 0               | 1                                      | 1                     | 1            | 3          |
| <b>Del18 E709-<br/>T710insD</b>    | 2                                 | 0               | 1               | 0               | 1                                      | 2                     | 1            | 5          |
| <b>Del19 E746-A750<br/>(alone)</b> | 215                               | 147             | 34              | 10              | 191                                    | 203                   | 56           | 1-4,6-33   |
| <b>Del19 E746-A750 +<br/>A871V</b> | 2                                 | 2               | 0               | 0               | 2                                      | 2                     | 2            | 4,34       |

|                                          |   |   |   |   |   |   |   |       |
|------------------------------------------|---|---|---|---|---|---|---|-------|
| <b>Del19 E746-A750 + E804K</b>           | 1 | 1 | 0 | 0 | 1 | 1 | 1 | 34    |
| <b>Del19 E746-A750 + G796A</b>           | 1 | 0 | 1 | 0 | 1 | 1 | 1 | 20    |
| <b>Del19 E746-A750 + L858R</b>           | 3 | 3 | 0 | 0 | 3 | 3 | 2 | 20,35 |
| <b>Del19 E746-A750 + L861Q</b>           | 1 | 0 | 1 | 0 | 1 | 1 | 1 | 3     |
| <b>Del19 E746-A750 + V802F</b>           | 1 | 1 | 0 | 0 | 1 | 1 | 1 | 1     |
| <b>Del19 E746-A750 + V851V</b>           | 1 | 0 | 1 | 0 | 1 | 1 | 1 | 36    |
| <b>Del19 E746-A750;L747-T751</b>         | 1 | 0 | 1 | 0 | 1 | 1 | 1 | 26    |
| <b>Del19 E746-A750insQ</b>               | 1 | 1 | 0 | 0 | 1 | 1 | 1 | 14    |
| <b>Del19 E746-E749</b>                   | 1 | 1 | 0 | 0 | 1 | 1 | 1 | 20    |
| <b>Del19 E746-E749 + Del19 S752-P753</b> | 1 | 1 | 0 | 0 | 1 | 1 | 1 | 17    |
| <b>Del19 E746I;L747-S752</b>             | 1 | 0 | 1 | 0 | 1 | 1 | 1 | 11    |
| <b>Del19 E746-</b>                       | 1 | 1 | 0 | 0 | 1 | 1 | 1 | 8     |

|                                    |    |   |   |   |   |   |   |                  |
|------------------------------------|----|---|---|---|---|---|---|------------------|
| <b>S752insA</b>                    |    |   |   |   |   |   |   |                  |
| <b>Del19 E746-S752insI</b>         | 1  | 1 | 0 | 0 | 1 | 1 | 1 | 14               |
| <b>Del19 E746-S725insV</b>         | 5  | 4 | 0 | 1 | 5 | 5 | 4 | 6,8,12,37        |
| <b>Del19 E746-T751</b>             | 2  | 1 | 1 | 0 | 2 | 2 | 2 | 12,16            |
| <b>Del19 E746-T751insA</b>         | 10 | 6 | 2 | 0 | 8 | 9 | 8 | 1-3,7,8,12,38,39 |
| <b>Del19 E746-T751insA + R803W</b> | 1  | 0 | 1 | 0 | 1 | 1 | 1 | 7                |
| <b>Del19 E746-T751insF</b>         | 1  | 1 | 0 | 0 | 1 | 1 | 1 | 23               |
| <b>Del19 E746-T751insV</b>         | 1  | 1 | 0 | 0 | 1 | 1 | 1 | 37               |
| <b>Del19 E746-T751insV + E865L</b> | 1  | 1 | 0 | 0 | 1 | 1 | 1 | 4                |
| <b>Del19 E746V;L747-S752</b>       | 3  | 3 | 0 | 0 | 3 | 3 | 3 | 19,40,41         |
| <b>Del19 E747-P753insS</b>         | 1  | 1 | 0 | 0 | 1 | 1 | 1 | 31               |
| <b>Del19 E747-T750</b>             | 1  | 1 | 0 | 0 | 1 | 1 | 1 | 31               |
| <b>Del19 K745-A750</b>             | 1  | 0 | 1 | 0 | 1 | 1 | 1 | 42               |
| <b>Del19 K745-</b>                 | 4  | 3 | 1 | 0 | 4 | 4 | 1 | 1                |

|                              |    |    |   |   |    |    |    |                   |
|------------------------------|----|----|---|---|----|----|----|-------------------|
| <b>A750insK</b>              |    |    |   |   |    |    |    |                   |
| <b>Del19 K745-E749</b>       | 1  | 1  | 0 | 0 | 1  | 1  | 1  | 43                |
| <b>Del19 K745-E749insK</b>   | 1  | 0  | 1 | 0 | 1  | 1  | 1  | 11                |
| <b>Del19 L746-E749</b>       | 1  | 1  | 0 | 0 | 1  | 1  | 1  | 13                |
| <b>Del19 L746-E749;A750P</b> | 2  | 2  | 0 | 0 | 2  | 2  | 1  | 41                |
| <b>Del19 L747-A750insP</b>   | 5  | 4  | 0 | 1 | 5  | 5  | 3  | 2,3,14            |
| <b>Del19 L747-A751insP</b>   | 6  | 3  | 1 | 0 | 4  | 3  | 1  | 39                |
| <b>Del19 L747-A755insS</b>   | 2  | 0  | 2 | 0 | 2  | 1  | 1  | 36                |
| <b>Del19 L747-E749</b>       | 1  | 1  | 0 | 0 | 1  | 1  | 1  | 7                 |
| <b>Del19 L747-E749;A750P</b> | 4  | 3  | 0 | 1 | 4  | 4  | 3  | 17,18,40          |
| <b>Del19 L747-E750insP</b>   | 3  | 2  | 0 | 0 | 2  | 3  | 1  | 13                |
| <b>Del19 L747-P752insPL</b>  | 1  | 1  | 0 | 0 | 1  | 1  | 1  | 44                |
| <b>Del19 L747-P753</b>       | 5  | 5  | 0 | 0 | 5  | 5  | 2  | 13,45             |
| <b>Del19 L747-</b>           | 14 | 13 | 1 | 0 | 14 | 14 | 10 | 4,6-8,28,40,44-47 |

|                                         |     |    |    |   |     |     |    |                                   |
|-----------------------------------------|-----|----|----|---|-----|-----|----|-----------------------------------|
| <b>P753insS</b>                         |     |    |    |   |     |     |    |                                   |
| <b>Del19 L747-<br/>P753insS + L861Q</b> | 1   | 1  | 0  | 0 | 1   | 1   | 1  | 12                                |
| <b>Del19 L747-S752</b>                  | 8   | 5  | 1  | 1 | 7   | 7   | 6  | 1,11,14,26,33,39                  |
| <b>Del19 L747-<br/>S752;P753S</b>       | 1   | 1  | 0  | 0 | 1   | 1   | 1  | 41                                |
| <b>Del19 L747-<br/>S752insQ</b>         | 2   | 2  | 0  | 0 | 2   | 2   | 2  | 10,45                             |
| <b>Del19 L747-<br/>S752insV</b>         | 1   | 1  | 0  | 0 | 1   | 1   | 1  | 46                                |
| <b>Del19 L747-T751</b>                  | 8   | 7  | 1  | 0 | 8   | 8   | 6  | 4,7,13,26,48,49                   |
| <b>Del19 L747-T751 +<br/>R776S</b>      | 1   | 1  | 0  | 0 | 1   | 1   | 1  | 27                                |
| <b>Del19 L747-<br/>T751insA</b>         | 1   | 1  | 0  | 0 | 1   | 1   | 1  | 23                                |
| <b>Del19 L747-<br/>T751insF</b>         | 1   | 1  | 0  | 0 | 1   | 1   | 1  | 12                                |
| <b>Del19 L747-<br/>T751insP</b>         | 1   | 1  | 0  | 0 | 1   | 1   | 1  | 8                                 |
| <b>Del19 S752-I759</b>                  | 1   | 1  | 0  | 0 | 1   | 1   | 1  | 14                                |
| <b>Del19 unspecified</b>                | 118 | 85 | 13 | 9 | 107 | 109 | 33 | 77–<br>105 <sup>15,27,50,51</sup> |

|                                          |    |   |   |   |          |           |          |               |
|------------------------------------------|----|---|---|---|----------|-----------|----------|---------------|
| <b>Del19 unspecified + L858R</b>         | 10 | 7 | 1 | 1 | <b>9</b> | <b>10</b> | <b>2</b> | 52,53         |
| <b>Del19 unspecified + L861Q</b>         | 2  | 1 | 1 | 0 | <b>2</b> | <b>2</b>  | <b>2</b> | 51,53         |
| <b>Del19 unspecified + L861Q + G873E</b> | 1  | 0 | 1 | 0 | <b>1</b> | <b>1</b>  | <b>1</b> | 51            |
| <b>Del19 unspecified + V774L</b>         | 1  | 1 | 0 | 0 | <b>1</b> | <b>1</b>  | <b>1</b> | 54            |
| <b>E709Q</b>                             | 1  | 1 | 0 | 0 | <b>1</b> | <b>1</b>  | <b>1</b> | 7             |
| <b>E746G</b>                             | 1  | 1 | 0 | 0 | <b>1</b> | <b>1</b>  | <b>1</b> | 5             |
| <b>E746V</b>                             | 1  | 0 | 1 | 0 | <b>1</b> | <b>1</b>  | <b>1</b> | 55            |
| <b>E868V</b>                             | 2  | 0 | 2 | 0 | <b>2</b> | <b>1</b>  | <b>1</b> | 36            |
| <b>Exon19 unspecified</b>                | 1  | 1 | 0 | 0 | <b>1</b> | <b>1</b>  | <b>1</b> | 56            |
| <b>F712S + D855G + E868G</b>             | 1  | 1 | 0 | 0 | <b>1</b> | <b>1</b>  | <b>1</b> | 3             |
| <b>G719A</b>                             | 11 | 6 | 1 | 0 | <b>7</b> | <b>11</b> | <b>5</b> | 8,11,12,23,49 |
| <b>G719A + E709A</b>                     | 1  | 1 | 0 | 0 | <b>1</b> | <b>1</b>  | <b>1</b> | 57            |
| <b>G719A + E709K</b>                     | 1  | 1 | 0 | 0 | <b>1</b> | <b>1</b>  | <b>1</b> | 8             |
| <b>G719A + G779C</b>                     | 1  | 1 | 0 | 0 | <b>1</b> | <b>1</b>  | <b>1</b> | 51            |
| <b>G719A + S720F</b>                     | 1  | 1 | 0 | 0 | <b>1</b> | <b>1</b>  | <b>1</b> | 34            |
| <b>G719C</b>                             | 2  | 2 | 0 | 0 | <b>2</b> | <b>2</b>  | <b>2</b> | 9,47          |
| <b>G719C + S768I</b>                     | 1  | 1 | 0 | 0 | <b>1</b> | <b>1</b>  | <b>1</b> | 34            |

|                              |   |   |   |   |   |   |   |       |
|------------------------------|---|---|---|---|---|---|---|-------|
| <b>G719D</b>                 | 3 | 1 | 2 | 0 | 3 | 3 | 2 | 5,55  |
| <b>G719D + L861Q</b>         | 1 | 1 | 0 | 0 | 1 | 1 | 1 | 5     |
| <b>G719S</b>                 | 1 | 0 | 1 | 0 | 1 | 1 | 1 | 14    |
| <b>G719S + I706T + Q701L</b> | 1 | 1 | 0 | 0 | 1 | 1 | 1 | 5     |
| <b>G721A</b>                 | 2 | 1 | 0 | 1 | 2 | 2 | 1 | 1     |
| <b>G779S</b>                 | 1 | 0 | 1 | 0 | 1 | 1 | 1 | 54    |
| <b>G857E</b>                 | 2 | 0 | 2 | 0 | 2 | 2 | 2 | 30,55 |
| <b>G857R</b>                 | 1 | 1 | 0 | 0 | 1 | 1 | 1 | 3     |
| <b>G863D</b>                 | 2 | 2 | 0 | 0 | 2 | 2 | 2 | 7,21  |
| <b>G863S</b>                 | 1 | 0 | 1 | 0 | 1 | 1 | 1 | 55    |
| <b>G874S</b>                 | 1 | 0 | 1 | 0 | 1 | 1 | 1 | 55    |
| <b>I744V</b>                 | 1 | 1 | 0 | 0 | 1 | 1 | 1 | 1     |
| <b>K708M</b>                 | 1 | 1 | 0 | 0 | 1 | 1 | 1 | 1     |
| <b>K846R</b>                 | 2 | 2 | 0 | 0 | 2 | 2 | 2 | 2,3   |
| <b>L692P</b>                 | 2 | 0 | 1 | 0 | 1 | 2 | 2 | 30,55 |
| <b>L703P</b>                 | 1 | 0 | 1 | 0 | 1 | 1 | 1 | 1     |
| <b>L718P</b>                 | 2 | 2 | 0 | 0 | 2 | 2 | 2 | 12,23 |
| <b>L747S</b>                 | 1 | 0 | 1 | 0 | 1 | 1 | 1 | 55    |
| <b>L838L</b>                 | 1 | 1 | 0 | 0 | 1 | 1 | 1 | 21    |
| <b>L838P</b>                 | 2 | 2 | 0 | 0 | 2 | 2 | 2 | 4,5   |
| <b>L858</b>                  | 6 | 2 | 2 | 0 | 4 | 3 | 1 | 58    |

|                                |     |     |    |   |            |            |           |                                                                                                                                 |
|--------------------------------|-----|-----|----|---|------------|------------|-----------|---------------------------------------------------------------------------------------------------------------------------------|
| <b>L858R (alone)</b>           | 235 | 156 | 47 | 7 | <b>210</b> | <b>225</b> | <b>62</b> | 1-4,6-22,24-<br>29,31,37,39,40,42<br>,45-48,50,59<br><br>70,73,74,7<br>8-<br>80,83,85-<br>87,89,90,9<br>2,94,99,10<br>4,107-117 |
| <b>L858R + D761Y (de novo)</b> | 2   | 0   | 1  | 0 | <b>1</b>   | <b>2</b>   | <b>2</b>  | 29,118                                                                                                                          |
| <b>L858R + E709A</b>           | 1   | 0   | 1  | 0 | <b>1</b>   | <b>1</b>   | <b>1</b>  | 15                                                                                                                              |
| <b>L858R + E709G</b>           | 3   | 2   | 0  | 0 | <b>2</b>   | <b>3</b>   | <b>1</b>  | 15                                                                                                                              |
| <b>L858R + E709K</b>           | 1   | 1   | 0  | 0 | <b>1</b>   | <b>1</b>   | <b>1</b>  | 81                                                                                                                              |
| <b>L858R + E758G</b>           | 2   | 2   | 0  | 0 | <b>2</b>   | <b>2</b>   | <b>2</b>  | 14,44                                                                                                                           |
| <b>L858R + G721S</b>           | 1   | 0   | 1  | 0 | <b>1</b>   | <b>1</b>   | <b>1</b>  | 29                                                                                                                              |
| <b>L858R + G779S</b>           | 3   | 3   | 0  | 0 | <b>3</b>   | <b>3</b>   | <b>2</b>  | 44,119                                                                                                                          |
| <b>L858R + H850D</b>           | 4   | 0   | 2  | 0 | <b>2</b>   | <b>4</b>   | <b>2</b>  | 17,44                                                                                                                           |
| <b>L858R + K860I</b>           | 1   | 1   | 0  | 0 | <b>1</b>   | <b>1</b>   | <b>1</b>  | 44                                                                                                                              |
| <b>L858R + L833V</b>           | 1   | 1   | 0  | 0 | <b>1</b>   | <b>1</b>   | <b>1</b>  | 84                                                                                                                              |
| <b>L858R + L861F</b>           | 1   | 1   | 0  | 0 | <b>1</b>   | <b>1</b>   | <b>1</b>  | 44                                                                                                                              |
| <b>L858R + R776C</b>           | 2   | 2   | 0  | 0 | <b>2</b>   | <b>2</b>   | <b>2</b>  | 16,86                                                                                                                           |
| <b>L858R + R776H</b>           | 1   | 1   | 0  | 0 | <b>1</b>   | <b>1</b>   | <b>1</b>  | 44                                                                                                                              |
| <b>L858R + S768I</b>           | 4   | 4   | 0  | 0 | <b>4</b>   | <b>4</b>   | <b>4</b>  | 15,17,44,1                                                                                                                      |



|                      |    |   |   |   |    |    |   |                                 |
|----------------------|----|---|---|---|----|----|---|---------------------------------|
|                      |    |   |   |   |    |    |   | 19                              |
| <b>L858R + V689L</b> | 1  | 1 | 0 | 0 | 1  | 1  | 1 | 32                              |
| <b>L858R + V802F</b> | 1  | 1 | 0 | 0 | 1  | 1  | 1 | 11                              |
| <b>L858R + V834L</b> | 1  | 1 | 0 | 0 | 1  | 1  | 1 | 44                              |
| <b>L858R + V843I</b> | 1  | 0 | 1 | 0 | 1  | 1  | 1 | 81                              |
| <b>L861Q (alone)</b> | 14 | 7 | 5 | 0 | 12 | 13 | 8 | 13,15,18,4<br>3,55,57,73,<br>76 |
| <b>L861Q + K860I</b> | 1  | 0 | 1 | 0 | 1  | 1  | 1 | 44                              |
| <b>L861Q + R776H</b> | 2  | 0 | 2 | 0 | 2  | 2  | 2 | <sup>13</sup> ,44               |
| <b>L861Q + R831H</b> | 2  | 0 | 2 | 0 | 2  | 2  | 2 | <sup>13</sup> ,44               |
| <b>L861R</b>         | 3  | 1 | 1 | 0 | 2  | 3  | 3 | 30 <sup>5,13</sup>              |
| <b>L861R+ R831C</b>  | 1  | 1 | 0 | 0 | 1  | 1  | 1 | <sup>5</sup>                    |
| <b>N700D</b>         | 1  | 1 | 0 | 0 | 1  | 1  | 1 | 18                              |
| <b>N756D</b>         | 1  | 1 | 0 | 0 | 1  | 1  | 1 | 25                              |
| <b>N826S</b>         | 1  | 0 | 1 | 0 | 1  | 1  | 1 | 18                              |
| <b>P691S</b>         | 1  | 0 | 1 | 0 | 1  | 1  | 1 | 81                              |
| <b>P699S</b>         | 1  | 1 | 0 | 0 | 1  | 1  | 1 | 13                              |
| <b>R748W</b>         | 1  | 0 | 1 | 0 | 1  | 1  | 1 | <sup>1</sup>                    |
| <b>R832L</b>         | 1  | 0 | 1 | 0 | 1  | 1  | 1 | <sup>1</sup>                    |
| <b>R836C</b>         | 1  | 1 | 0 | 0 | 1  | 1  | 1 | 13                              |
| <b>S720P</b>         | 1  | 1 | 0 | 0 | 1  | 1  | 1 | 18                              |
| <b>S768I</b>         | 1  | 1 | 0 | 0 | 1  | 1  | 1 | 120                             |

|                                          |    |   |    |   |    |    |    |                           |
|------------------------------------------|----|---|----|---|----|----|----|---------------------------|
| <b>S768I + L815L</b>                     | 1  | 1 | 0  | 0 | 1  | 1  | 1  | 92                        |
| <b>S784F + V786M</b>                     | 1  | 1 | 0  | 0 | 1  | 1  | 1  | 121                       |
| <b>S784P</b>                             | 1  | 1 | 0  | 0 | 1  | 1  | 1  | <sup>1</sup>              |
| <b>S921R</b>                             | 1  | 0 | 1  | 0 | 1  | 1  | 1  | <sup>1</sup>              |
| <b>T783A</b>                             | 1  | 1 | 0  | 0 | 1  | 1  | 1  | 18                        |
| <b>V689M</b>                             | 1  | 1 | 0  | 0 | 1  | 1  | 1  | 18                        |
| <b>V726M</b>                             | 1  | 0 | 1  | 0 | 1  | 1  | 1  | 81                        |
| <b>V740A</b>                             | 2  | 2 | 0  | 0 | 2  | 2  | 1  | <sup>1</sup>              |
| <b>V740L</b>                             | 2  | 1 | 0  | 1 | 2  | 2  | 1  | <sup>1</sup>              |
| <b>V742A</b>                             | 1  | 0 | 1  | 0 | 1  | 1  | 1  | 14                        |
| <b>V765A</b>                             | 1  | 1 | 0  | 0 | 1  | 1  | 1  | 18                        |
| <b>V765M + L798H +<br/>K806E + L814P</b> | 3  | 3 | 0  | 0 | 3  | 3  | 1  | 13                        |
| <b>V774A</b>                             | 1  | 1 | 0  | 0 | 1  | 1  | 1  | 15                        |
| <b>V819V</b>                             | 1  | 0 | 1  | 0 | 1  | 1  | 1  | 92                        |
| <b>V834I</b>                             | 1  | 1 | 0  | 0 | 1  | 1  | 1  | 15                        |
| <b>V843I</b>                             | 1  | 0 | 1  | 0 | 1  | 1  | 1  | 81                        |
| <b>V851I</b>                             | 2  | 0 | 1  | 0 | 1  | 2  | 2  | 14,15                     |
| <b>W731Stop</b>                          | 3  | 0 | 2  | 0 | 2  | 3  | 3  | 12,13,24                  |
| <b>Y727H</b>                             | 1  | 0 | 1  | 0 | 1  | 1  | 1  | 81                        |
| <b>Wild-type</b>                         | 88 | 7 | 57 | 0 | 64 | 83 | 11 | 33,34,56,7<br>0,78,85,88, |

|  |  |  |  |  |  |  |  |                   |
|--|--|--|--|--|--|--|--|-------------------|
|  |  |  |  |  |  |  |  | 91,98,122,<br>123 |
|--|--|--|--|--|--|--|--|-------------------|

<sup>†</sup>Response is defined as patients achieving CR (complete response), PR (partial response), or SD (stable disease) as defined by the Response Evaluation Criteria in Solid Tumors (RECIST) (7) following treatment with EGFR TKI (gefitinib or erlotinib).

<sup>a</sup> Number of unique patients does not match the number of therapy-response entries since one patient may have been treated with EGFR TKIs in different lines of treatment and thus may have multiple associated therapy-response entries.

\*Number of unique studies refers to the number of different studies that encompass all of the patients with a particular mutation in DIRECT.



## References

1. Xu JM, Han Y, Duan HQ, et al. EGFR mutations and HER2/3 protein expression and clinical outcome in Chinese advanced non-small cell lung cancer patients treated with gefitinib. *Journal of cancer research and clinical oncology* 2009;135:771-82.
2. Huang SF, Liu HP, Li LH, et al. High frequency of epidermal growth factor receptor mutations with complex patterns in non-small cell lung cancers related to gefitinib responsiveness in Taiwan. *Clinical cancer research : an official journal of the American Association for Cancer Research* 2004;10:8195-203.
3. Hsieh MH, Fang YF, Chang WC, et al. Complex mutation patterns of epidermal growth factor receptor gene associated with variable responses to gefitinib treatment in patients with non-small cell lung cancer. *Lung Cancer* 2006;53:311-22.
4. Shih JY, Gow CH, Yu CJ, et al. Epidermal growth factor receptor mutations in needle biopsy/aspiration samples predict response to gefitinib therapy and survival of patients with advanced nonsmall cell lung cancer. *International journal of cancer Journal international du cancer* 2006;118:963-9.
5. Wu JY, Yu CJ, Chang YC, Yang CH, Shih JY, Yang PC. Effectiveness of tyrosine kinase inhibitors on "uncommon" epidermal growth factor receptor mutations of unknown clinical significance in non-small cell lung cancer. *Clinical cancer research : an official journal of the American Association for Cancer Research* 2011;17:3812-21.
6. Asahina H, Yamazaki K, Kinoshita I, et al. A phase II trial of gefitinib as first-line therapy for advanced non-small cell lung cancer with epidermal growth factor receptor mutations. *British journal of cancer* 2006;95:998-1004.
7. Chou TY, Chiu CH, Li LH, et al. Mutation in the tyrosine kinase domain of epidermal growth factor receptor is a predictive and prognostic factor for gefitinib treatment in patients with non-small cell lung cancer. *Clinical cancer research : an official journal of the American Association for Cancer Research* 2005;11:3750-7.
8. Han SW, Kim TY, Hwang PG, et al. Predictive and prognostic impact of epidermal growth factor receptor mutation in non-small-cell lung cancer patients treated with gefitinib. *Journal of clinical oncology : official journal of the American Society of Clinical Oncology* 2005;23:2493-501.
9. Kondo M, Yokoyama T, Fukui T, et al. Mutations of epidermal growth factor receptor of non-small cell lung cancer were associated with sensitivity to gefitinib in recurrence after surgery. *Lung Cancer* 2005;50:385-91.

10. Pao W, Miller V, Zakowski M, et al. EGF receptor gene mutations are common in lung cancers from "never smokers" and are associated with sensitivity of tumors to gefitinib and erlotinib. *Proceedings of the National Academy of Sciences of the United States of America* 2004;101:13306-11.
11. Sone T, Kasahara K, Kimura H, et al. Comparative analysis of epidermal growth factor receptor mutations and gene amplification as predictors of gefitinib efficacy in Japanese patients with nonsmall cell lung cancer. *Cancer* 2007;109:1836-44.
12. Taron M, Ichinose Y, Rosell R, et al. Activating mutations in the tyrosine kinase domain of the epidermal growth factor receptor are associated with improved survival in gefitinib-treated chemorefractory lung adenocarcinomas. *Clinical cancer research : an official journal of the American Association for Cancer Research* 2005;11:5878-85.
13. Yang CH, Yu CJ, Shih JY, et al. Specific EGFR mutations predict treatment outcome of stage IIIB/IV patients with chemotherapy-naive non-small-cell lung cancer receiving first-line gefitinib monotherapy. *Journal of clinical oncology : official journal of the American Society of Clinical Oncology* 2008;26:2745-53.
14. Ichihara S, Toyooka S, Fujiwara Y, et al. The impact of epidermal growth factor receptor gene status on gefitinib-treated Japanese patients with non-small-cell lung cancer. *International journal of cancer Journal international du cancer* 2007;120:1239-47.
15. Kim KS, Jeong JY, Kim YC, et al. Predictors of the response to gefitinib in refractory non-small cell lung cancer. *Clinical cancer research : an official journal of the American Association for Cancer Research* 2005;11:2244-51.
16. Kimura H, Suminoe M, Kasahara K, et al. Evaluation of epidermal growth factor receptor mutation status in serum DNA as a predictor of response to gefitinib (IRESSA). *British journal of cancer* 2007;97:778-84.
17. Miyamae Y, Shimizu K, Mitani Y, et al. Mutation detection of epidermal growth factor receptor and KRAS genes using the smart amplification process version 2 from formalin-fixed, paraffin-embedded lung cancer tissue. *The Journal of molecular diagnostics : JMD* 2010;12:257-64.
18. Molina-Vila MA, Bertran-Alamillo J, Reguart N, et al. A sensitive method for detecting EGFR mutations in non-small cell lung cancer samples with few tumor cells. *Journal of thoracic oncology : official publication of the International Association for the Study of Lung Cancer* 2008;3:1224-35.
19. Niho S, Kubota K, Goto K, et al. First-line single agent treatment with gefitinib in patients with advanced non-small-cell lung cancer: a phase II study. *Journal of clinical oncology : official journal of the American Society of Clinical Oncology* 2006;24:64-9.
20. Sugio K, Uramoto H, Onitsuka T, et al. Prospective phase II study of gefitinib in non-small cell lung cancer with epidermal growth factor receptor gene mutations. *Lung Cancer* 2009;64:314-8.
21. Tomizawa Y, Iijima H, Sunaga N, et al. Clinicopathologic significance of the mutations of the epidermal growth factor receptor gene in patients with non-small cell lung cancer. *Clinical cancer research : an official journal of the American Association for Cancer Research* 2005;11:6816-22.

22. Zhang GC, Lin JY, Wang Z, et al. Epidermal growth factor receptor double activating mutations involving both exons 19 and 21 exist in Chinese non-small cell lung cancer patients. *Clin Oncol (R Coll Radiol)* 2007;19:499-506.
23. Rosell R, Ichinose Y, Taron M, et al. Mutations in the tyrosine kinase domain of the EGFR gene associated with gefitinib response in non-small-cell lung cancer. *Lung Cancer* 2005;50:25-33.
24. Hung MS, Lin CK, Leu SW, Wu MY, Tsai YH, Yang CT. Epidermal growth factor receptor mutations in cells from non-small cell lung cancer malignant pleural effusions. *Chang Gung medical journal* 2006;29:373-9.
25. Kimura H, Kasahara K, Kawaishi M, et al. Detection of epidermal growth factor receptor mutations in serum as a predictor of the response to gefitinib in patients with non-small-cell lung cancer. *Clinical cancer research : an official journal of the American Association for Cancer Research* 2006;12:3915-21.
26. Oshita F, Matsukuma S, Yoshihara M, et al. Novel heteroduplex method using small cytology specimens with a remarkably high success rate for analysing EGFR gene mutations with a significant correlation to gefitinib efficacy in non-small-cell lung cancer. *British journal of cancer* 2006;95:1070-5.
27. Yeo WL, Riely GJ, Yeap BY, et al. Erlotinib at a dose of 25 mg daily for non-small cell lung cancers with EGFR mutations. *Journal of thoracic oncology : official publication of the International Association for the Study of Lung Cancer* 2010;5:1048-53.
28. Zhang XT, Li LY, Mu XL, et al. The EGFR mutation and its correlation with response of gefitinib in previously treated Chinese patients with advanced non-small-cell lung cancer. *Annals of oncology : official journal of the European Society for Medical Oncology / ESMO* 2005;16:1334-42.
29. Hoshi K, Takakura H, Mitani Y, et al. Rapid detection of epidermal growth factor receptor mutations in lung cancer by the SMart-Amplification Process. *Clinical cancer research : an official journal of the American Association for Cancer Research* 2007;13:4974-83.
30. Kalikaki A, Koutsopoulos A, Trypaki M, et al. Comparison of EGFR and K-RAS gene status between primary tumours and corresponding metastases in NSCLC. *British journal of cancer* 2008;99:923-9.
31. Kimura H, Fujiwara Y, Sone T, et al. EGFR mutation status in tumour-derived DNA from pleural effusion fluid is a practical basis for predicting the response to gefitinib. *British journal of cancer* 2006;95:1390-5.
32. Kimura H, Fujiwara Y, Sone T, et al. High sensitivity detection of epidermal growth factor receptor mutations in the pleural effusion of non-small cell lung cancer patients. *Cancer science* 2006;97:642-8.
33. Mukohara T, Engelman JA, Hanna NH, et al. Differential effects of gefitinib and cetuximab on non-small-cell lung cancers bearing epidermal growth factor receptor mutations. *Journal of the National Cancer Institute* 2005;97:1185-94.

34. Wu SG, Chang YL, Hsu YC, et al. Good response to gefitinib in lung adenocarcinoma of complex epidermal growth factor receptor (EGFR) mutations with the classical mutation pattern. *The oncologist* 2008;13:1276-84.
35. Masago K, Fujita S, Kim YH, et al. Epidermal growth factor receptor (EGFR) double-activating somatic mutations in exons 19 and 21 in Japanese non-small cell lung cancer patients. *Cancer genetics and cytogenetics* 2009;195:179-82.
36. Wong AS, Soong R, Seah SB, et al. Evidence for disease control with erlotinib after gefitinib failure in typical gefitinib-sensitive Asian patients with non-small cell lung cancer. *Journal of thoracic oncology : official publication of the International Association for the Study of Lung Cancer* 2008;3:400-4.
37. Wu JY, Yang CH, Hsu YC, et al. Use of cetuximab after failure of gefitinib in patients with advanced non-small-cell lung cancer. *Clinical lung cancer* 2010;11:257-63.
38. Bean J, Riely GJ, Balak M, et al. Acquired resistance to epidermal growth factor receptor kinase inhibitors associated with a novel T854A mutation in a patient with EGFR-mutant lung adenocarcinoma. *Clinical cancer research : an official journal of the American Association for Cancer Research* 2008;14:7519-25.
39. Costa DB, Nguyen KS, Cho BC, et al. Effects of erlotinib in EGFR mutated non-small cell lung cancers with resistance to gefitinib. *Clinical cancer research : an official journal of the American Association for Cancer Research* 2008;14:7060-7.
40. Engelman JA, Zejnullahu K, Mitsudomi T, et al. MET amplification leads to gefitinib resistance in lung cancer by activating ERBB3 signaling. *Science* 2007;316:1039-43.
41. Paez JG, Janne PA, Lee JC, et al. EGFR mutations in lung cancer: correlation with clinical response to gefitinib therapy. *Science* 2004;304:1497-500.
42. Inukai M, Toyooka S, Ito S, et al. Presence of epidermal growth factor receptor gene T790M mutation as a minor clone in non-small cell lung cancer. *Cancer research* 2006;66:7854-8.
43. Benedetti G, Latini L, Galetta D, Colucci G, Crino L. Epidermal growth factor receptor exon 19 deletions predict complete regression of multiple intracranial metastases in two cases of non-small cell lung cancer treated with erlotinib. *Journal of thoracic oncology : official publication of the International Association for the Study of Lung Cancer* 2009;4:936-7.
44. Takahashi T, Yamamoto N, Nukiwa T, et al. Phase II study of erlotinib in Japanese patients with advanced non-small cell lung cancer. *Anticancer research* 2010;30:557-63.
45. Bean J, Brennan C, Shih JY, et al. MET amplification occurs with or without T790M mutations in EGFR mutant lung tumors with acquired resistance to gefitinib or erlotinib. *Proceedings of the National Academy of Sciences of the United States of America* 2007;104:20932-7.



46. Donovan MJ, Kotsianti A, Bayer-Zubek V, et al. A systems pathology model for predicting overall survival in patients with refractory, advanced non-small-cell lung cancer treated with gefitinib. *Eur J Cancer* 2009;45:1518-26.
47. Lynch TJ, Bell DW, Sordella R, et al. Activating mutations in the epidermal growth factor receptor underlying responsiveness of non-small-cell lung cancer to gefitinib. *The New England journal of medicine* 2004;350:2129-39.
48. Jiang SX, Yamashita K, Yamamoto M, et al. EGFR genetic heterogeneity of nonsmall cell lung cancers contributing to acquired gefitinib resistance. *International journal of cancer Journal international du cancer* 2008;123:2480-6.
49. Ko HW, Tsai YH, Yu CT, Huang CY, Chen CH. Good response to gefitinib for lung adenocarcinoma with hyperamylasemia: a case report. *Chang Gung medical journal* 2008;31:606-11.
50. Balak MN, Gong Y, Riely GJ, et al. Novel D761Y and common secondary T790M mutations in epidermal growth factor receptor-mutant lung adenocarcinomas with acquired resistance to kinase inhibitors. *Clinical cancer research : an official journal of the American Association for Cancer Research* 2006;12:6494-501.
51. Jackman DM, Miller VA, Cioffredi LA, et al. Impact of epidermal growth factor receptor and KRAS mutations on clinical outcomes in previously untreated non-small cell lung cancer patients: results of an online tumor registry of clinical trials. *Clinical cancer research : an official journal of the American Association for Cancer Research* 2009;15:5267-73.
52. Cappuzzo F, Ligorio C, Janne PA, et al. Prospective study of gefitinib in epidermal growth factor receptor fluorescence in situ hybridization-positive/phospho-Akt-positive or never smoker patients with advanced non-small-cell lung cancer: the ONCOBELL trial. *Journal of clinical oncology : official journal of the American Society of Clinical Oncology* 2007;25:2248-55.
53. Hata A, Yoshioka H, Fujita S, et al. Complex mutations in the epidermal growth factor receptor gene in non-small cell lung cancer. *Journal of thoracic oncology : official publication of the International Association for the Study of Lung Cancer* 2010;5:1524-8.
54. Pugh TJ, Bebb G, Barclay L, et al. Correlations of EGFR mutations and increases in EGFR and HER2 copy number to gefitinib response in a retrospective analysis of lung cancer patients. *BMC cancer* 2007;7:128.
55. Pallis AG, Voutsina A, Kalikaki A, et al. 'Classical' but not 'other' mutations of EGFR kinase domain are associated with clinical outcome in gefitinib-treated patients with non-small cell lung cancer. *British journal of cancer* 2007;97:1560-6.
56. Dallas JL, Jantz MA, Lightsey JL, Sonntag C, Kaye FJ. Successful erlotinib rechallenge after erlotinib-induced interstitial lung disease. *Journal of thoracic oncology : official publication of the International Association for the Study of Lung Cancer* 2011;6:1142-3.

57. van Zandwijk N, Mathy A, Boerrigter L, et al. EGFR and KRAS mutations as criteria for treatment with tyrosine kinase inhibitors: retro- and prospective observations in non-small-cell lung cancer. *Annals of oncology : official journal of the European Society for Medical Oncology / ESMO* 2007;18:99-103.
58. Sim SH, Han SW, Oh DY, et al. Erlotinib after Gefitinib failure in female never-smoker Asian patients with pulmonary adenocarcinoma. *Lung Cancer* 2009;65:204-7.
59. Takamochi K, Suzuki K, Sugimura H, et al. Surgical resection after gefitinib treatment in patients with lung adenocarcinoma harboring epidermal growth factor receptor gene mutation. *Lung Cancer* 2007;58:149-55.
